# Supplementary material for: Modified Nanoemulsions with Iron Oxide for Magnetic Resonance Imaging
Source: MDPI journal article supplement (doi:10.3390/nano6120223), 2016-11-25
Supplement: s1 [file s1]

# Supplementary Materials: Modified Nanoemulsion with Iron Oxide for Magnetic Resonance Imaging

Yongyi Fan, Rui Guo, Xiangyang Shi, Steven Allen, Zhengyi Cao, James R. Baker and Su He Wang

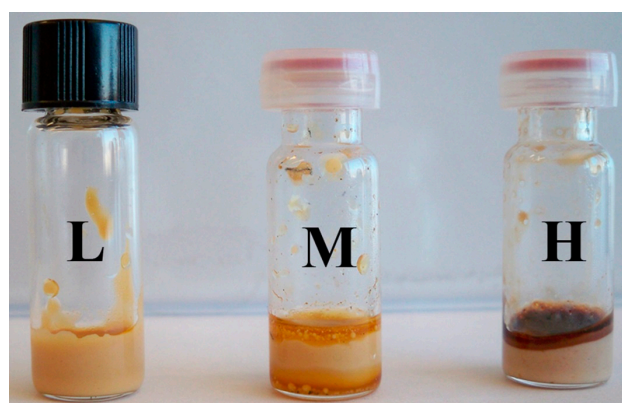

|                      | Size (nm)     | ZP (mv)     |
|----------------------|---------------|-------------|
| <b>Modified NE-L</b> | <b>521.1</b>  | <b>9.64</b> |
| <b>Modified NE-M</b> | <b>704.8</b>  | <b>9.66</b> |
| <b>Modified NE-H</b> | <b>1469.0</b> | <b>23.7</b> |

**Figure S1.** Stability of iron oxide-modified NE with different concentrations of iron oxide nanoparticles. L: low concentration (30  $\mu\text{g}/\mu\text{L}$ ); M: moderate concentration (35  $\mu\text{g}/\mu\text{L}$ ); H: high concentration (40  $\mu\text{g}/\mu\text{L}$ ). For each formulation the size of the droplets and the zeta potential are shown.

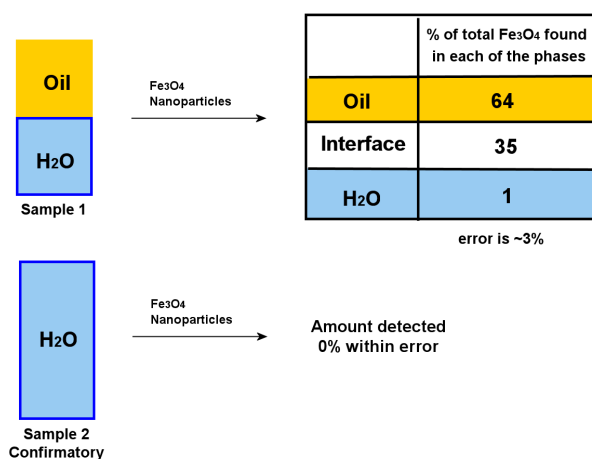

**Figure S2.** The distribution of Fe<sub>3</sub>O<sub>4</sub> in oil phase and water phase of iron oxide-modified nanoemulsion.

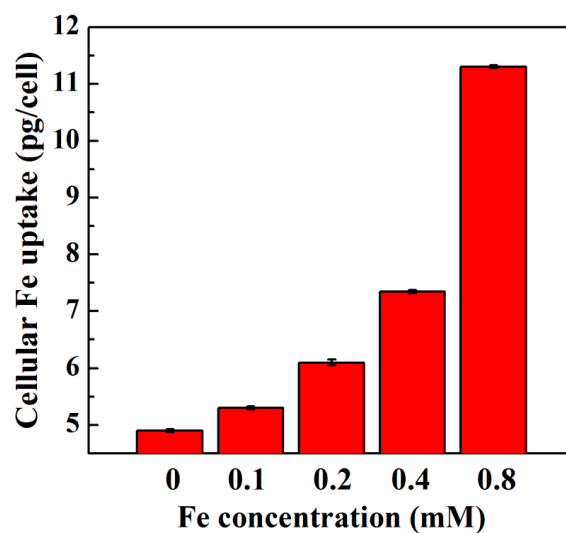

**Figure S3.** The Fe uptake by TC-1 cells treated with Fe<sub>3</sub>O<sub>4</sub> modified NEs at the Fe concentration of 0–0.8 mM for 15 min.

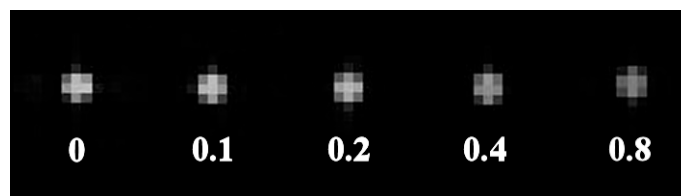

**Figure S4.** The MR image of TC-1 cells with 0–0.8 mM of iron oxide-modified NEs.

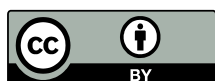

© 2016 by the authors; licensee MDPI, Basel, Switzerland. This article is an open access article distributed under the terms and conditions of the Creative Commons by Attribution (CC-BY) license (<http://creativecommons.org/licenses/by/4.0/>).
